# Supplementary material
Source: Royal Society of Chemistry journal article supplement (doi:10.1039/d6ta03381d)
Supplement: d6ta03381d1.pdf [file d6ta03381d1.pdf]

# **Probing and Understanding Performances of Conductive Organic Radical Salts as Positive Electrode Material for anion-ion and dual-ion Batteries**

Manon Mignon<sup>[a,c]</sup>, Hugo Bevan<sup>[b]</sup>, Jean-Noël Chotard<sup>[a,c]</sup>, Carine Davoisne,<sup>[a,c]</sup> Yann Le Gal<sup>[b]</sup>,

Olivier Jeannin<sup>[b]</sup>, Dominique Lorcy\*<sup>[b]</sup>, Marc Fourmigué<sup>[b]</sup>, Matthieu Becuwe\*<sup>[a,c]</sup>

**SUPPLEMENTARY INFORMATION**

**Table S1 Electrocrystallization conditions**

| X = Br <sup>-</sup> , BF <sub>4</sub> <sup>-</sup> , ClO <sub>4</sub> <sup>-</sup> ,<br>PF <sub>6</sub> <sup>-</sup> , AsF <sub>6</sub> <sup>-</sup> | (TMTTF) <sub>2</sub> Br | (TMTTF) <sub>2</sub> BF <sub>4</sub> | (TMTTF) <sub>2</sub> ClO <sub>4</sub> | (TMTTF) <sub>2</sub> PF <sub>6</sub> | (TMTTF) <sub>2</sub> AsF <sub>6</sub> |            |
|------------------------------------------------------------------------------------------------------------------------------------------------------|-------------------------|--------------------------------------|---------------------------------------|--------------------------------------|---------------------------------------|------------|
| TMTTF (mg, mmol)                                                                                                                                     | 150, 0.57               | 150, 0.57                            | 400, 1.54                             | 400, 1.54                            | 600, 2.3                              | 150, 0.57  |
| TBAX (g, mmol)                                                                                                                                       | 1.47, 4.56              | 2.87, 8.73                           | 8.0, 24.3                             | 8.0, 23.4                            | 12.0, 31.0                            | 3.77, 8.74 |
| TBAX (mmol)                                                                                                                                          | 4.56                    | 8.73                                 | 24.3                                  | 23.4                                 | 31.0                                  | 8.74       |
| I (μA)                                                                                                                                               | 200                     | 200                                  | 400                                   | 400                                  | 600                                   | 200        |
| (TMTTF) <sub>2</sub> X (mg)                                                                                                                          | 34                      | 74                                   | 126                                   | 225                                  | 504                                   | 91         |
| Yield                                                                                                                                                | 20%                     | 43%                                  | 27%                                   | 47%                                  | 66%                                   | 45%        |

**Table S2 Chemical oxidation conditions for (TMTTF)<sub>2</sub>X synthesis**

| X = BF <sub>4</sub> <sup>-</sup> , ClO <sub>4</sub> <sup>-</sup> , PF <sub>6</sub> <sup>-</sup> | (TMTTF) <sub>2</sub> BF <sub>4</sub> | (TMTTF) <sub>2</sub> ClO <sub>4</sub> | (TMTTF) <sub>2</sub> PF <sub>6</sub> |             |
|-------------------------------------------------------------------------------------------------|--------------------------------------|---------------------------------------|--------------------------------------|-------------|
| TMTTF (mg, mmol)                                                                                | 100, 0.38                            | 400, 1.54                             | 100, 0.38                            | 100, 0.38   |
| V H <sub>2</sub> O <sub>2</sub> (μL)                                                            | 9.9, 96.0                            | 39.6, 384.0                           | 9.9, 96.0                            | 9.9, 96.0   |
| V HX (μL, μmol)                                                                                 | 24.0, 192.0                          | 95.6, 768.0                           | 16.6, 192.0                          | 28.3, 192.0 |
| V THF (mL)                                                                                      | 20                                   | 60                                    | 20                                   | 20          |
| (TMTTF) <sub>2</sub> X (mg)                                                                     | 30                                   | 255                                   | 60                                   | 18          |
| Yield                                                                                           | 25%                                  | 54%                                   | 51%                                  | 14%         |

**Table S3: Crystallographic data**

|                                                           | TMTTF                                          | (TMTTF)Br(H <sub>2</sub> O) <sub>2</sub>                        |
|-----------------------------------------------------------|------------------------------------------------|-----------------------------------------------------------------|
| CCDC deposit nb.                                          | 2545862                                        | 2545863                                                         |
| Formulae                                                  | C <sub>10</sub> H <sub>12</sub> S <sub>4</sub> | C <sub>10</sub> H <sub>16</sub> BrO <sub>2</sub> S <sub>4</sub> |
| FW (g.mol <sup>-1</sup> )                                 | 260.44                                         | 376.37                                                          |
| System                                                    | monoclinic                                     | monoclinic                                                      |
| Space group                                               | C2/c                                           | C2/m                                                            |
| <i>a</i> (Å)                                              | 15.773(2)                                      | 16.6579(19)                                                     |
| <i>b</i> (Å)                                              | 5.9995(10)                                     | 9.7456(11)                                                      |
| <i>c</i> (Å)                                              | 14.248(2)                                      | 9.0958(10)                                                      |
| $\alpha$ (deg)                                            | 90.00                                          | 90.00                                                           |
| $\beta$ (deg)                                             | 119.826(5)                                     | 97.894(5)                                                       |
| $\gamma$ (deg)                                            | 90.00                                          | 90.00                                                           |
| <i>V</i> (Å <sup>3</sup> )                                | 1169.7(3)                                      | 1462.6(3)                                                       |
| <i>T</i> (K)                                              | 150(2)                                         | 150(2)                                                          |
| <i>Z</i>                                                  | 4                                              | 4                                                               |
| Cryst. dim. (mm)                                          | 0.31×0.06×0.05                                 | 0.13×0.11×0.06                                                  |
| <i>D</i> <sub>calc</sub> (g.cm <sup>-3</sup> )            | 1.479                                          | 1.709                                                           |
| $\mu$ (mm <sup>-1</sup> )                                 | 0.77                                           | 3.369                                                           |
| Absorption corr.                                          | multi-scan                                     | multi-scan                                                      |
| <i>T</i> <sub>min</sub> , <i>T</i> <sub>max</sub>         | 0.946, 0.962                                   | 0.4711, 0.7456                                                  |
| Total refls                                               | 4253                                           | 8455                                                            |
| Uniq refls ( <i>R</i> <sub>int</sub> )                    | 1323 (0.0671)                                  | 1772 (0.0268)                                                   |
| Uniq refls ( <i>I</i> > 2 $\sigma$ ( <i>I</i> ))          | 1027                                           | 1638                                                            |
| <i>R</i> <sub>1</sub> , <i>wR</i> <sub>2</sub>            | 0.0804, 0.1985                                 | 0.023, 0.063                                                    |
| <i>R</i> <sub>1</sub> , <i>wR</i> <sub>2</sub> (all data) | 0.0961, 0.2129                                 | 0.026, 0.0645                                                   |
| GOF                                                       | 1.058                                          | 1.017                                                           |

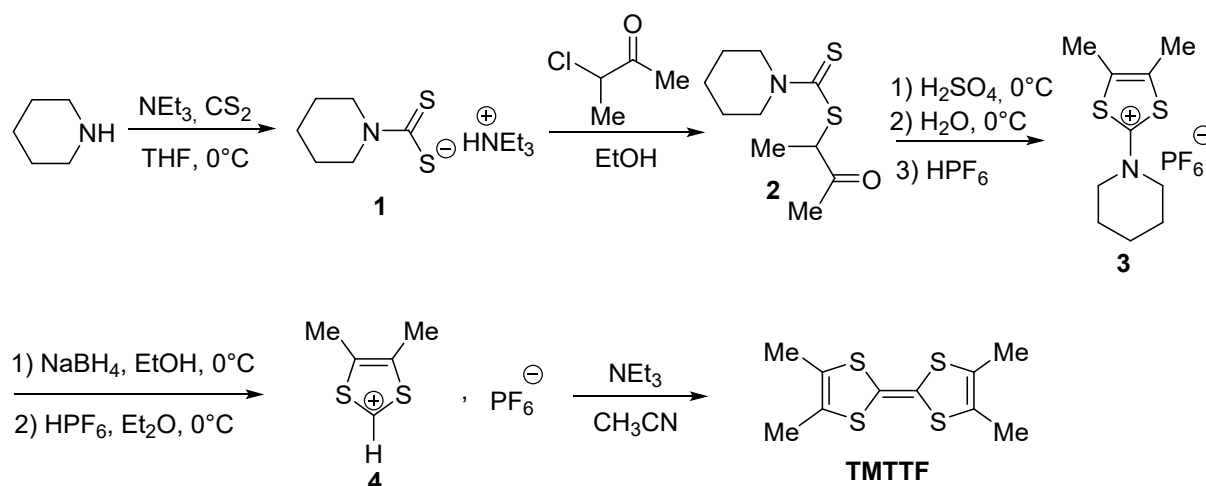**Fig. S1: Synthetic pathway towards TMTTF**

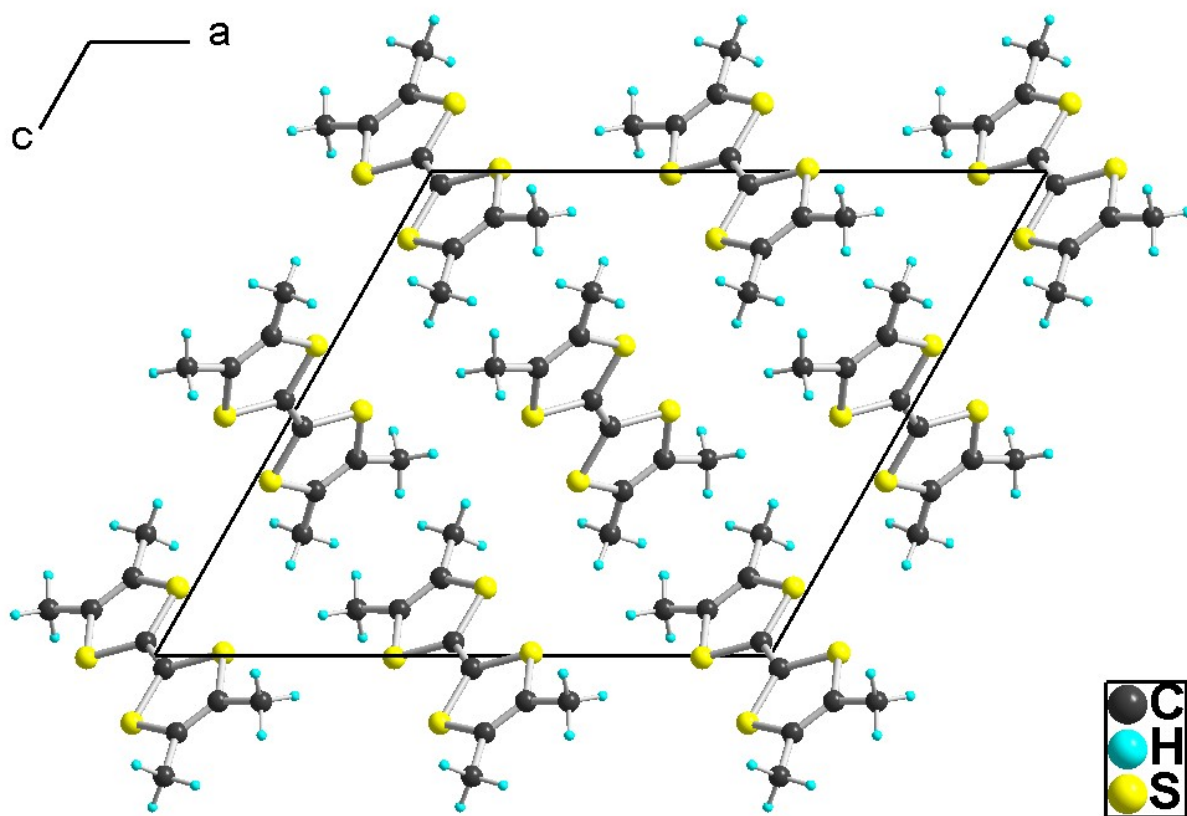

Fig. S2: Projection view along the *b* axis of the unit cell of TMTTF (monoclinic phase)

**Table S4: Evolutions of averaged intramolecular bond distances (a - d) in neutral TMTTF and its bromide salts**

| 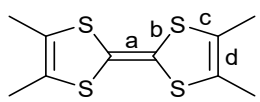 | a (Å)     | b (Å)    | c (Å)    | d (Å)    | T (K) | Ref.      |
|-----------------------------------------------------------------------------------|-----------|----------|----------|----------|-------|-----------|
| TMTTF <sup>0</sup>                                                                | 1.359(2)  | 1.763(2) | 1.767(3) | 1.343(2) | 120   | [1]       |
| TMTTF <sup>0</sup>                                                                | 1.339(5)  | 1.758(5) | 1.760(4) | 1.337(8) | 150   | this work |
| TMTTF <sup>+</sup> Br <sup>-</sup> <sup>(a)</sup> Mol. A                          | 1.415(10) | 1.712(4) | 1.746(5) | 1.358(7) | RT    | [2]       |
| Mol. B                                                                            | 1.394(10) | 1.717(4) | 1.740(6) | 1.336(7) |       |           |
| TMTTF <sup>+</sup> Br <sup>-</sup> <sup>(b)</sup>                                 | 1.394(5)  | 1.720(2) | 1.738(4) | 1.350(2) | 150   | this work |

(a) In the salt formulated as (TMTTF)(Br)(PhCN)0.5(H<sub>2</sub>O)0.5; (b) In the newly reported salt formulated as (TMTTF)Br(H<sub>2</sub>O)<sub>2</sub>

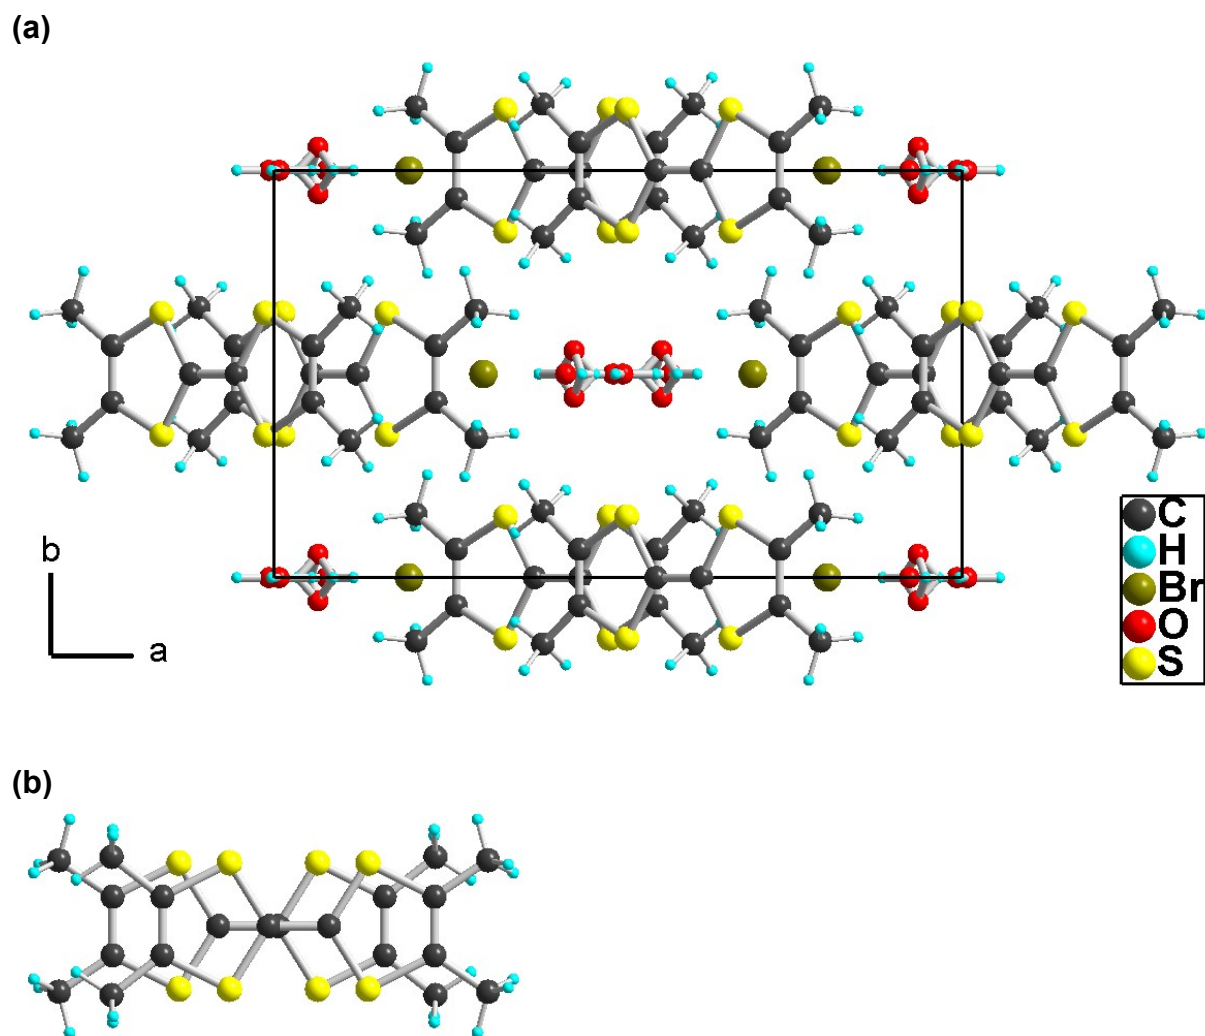

**Figure S3: Details of the crystal structure of  $(\text{TMTTF})\text{Br}(\text{H}_2\text{O})_2$ , (a) projection view of the unit cell along the  $c$  axis, and (b) intra-dimer bond-over-ring overlap**

**Table S5: Measured unit cell parameters of (TMTTF)<sub>2</sub>BF<sub>4</sub>, (TMTTF)<sub>2</sub>ClO<sub>4</sub>, (TMTTF)<sub>2</sub>PF<sub>6</sub> and (TMTTF)<sub>2</sub>AsF<sub>6</sub>.**

|                            | (TMTTF) <sub>2</sub> BF <sub>4</sub> | (TMTTF) <sub>2</sub> ClO <sub>4</sub> | (TMTTF) <sub>2</sub> PF <sub>6</sub> | (TMTTF) <sub>2</sub> AsF <sub>6</sub> |
|----------------------------|--------------------------------------|---------------------------------------|--------------------------------------|---------------------------------------|
| Systeme and space group    | Triclinic $P\bar{1}$                 | Triclinic $P\bar{1}$                  | Triclinic $P\bar{1}$                 | Triclinic $P\bar{1}$                  |
| T°                         | RT                                   | RT                                    | RT                                   | RT                                    |
| <i>a</i> (Å)               | 7.11(8)                              | 7.13(4)                               | 7.15(4)                              | 7.1634(12)                            |
| <i>b</i> (Å)               | 7.48(6)                              | 7.53(0)                               | 7.57(7)                              | 7.6095(11)                            |
| <i>c</i> (Å)               | 12.94(4)                             | 13.015(8)                             | 13.21(1)                             | 13.2991(21)                           |
| $\alpha$ (°)               | 85.46(8)                             | 84.40(4)                              | 82.58(5)                             | 81.9639(53)                           |
| $\beta$ (°)                | 85.97(3)                             | 85.23(9)                              | 84.62(4)                             | 84.1452(59)                           |
| $\gamma$ (°)               | 71.23(9)                             | 71.60(3)                              | 72.39(1)                             | 73.0613(55)                           |
| <i>V</i> (Å <sup>3</sup> ) | 650.38(2)                            | 6593.34(2)                            | 675.7(37)                            | 685.23(18)                            |

**Table S6: Unit cell parameters of, (TMTTF)<sub>2</sub>ClO<sub>4</sub>, (TMTTF)<sub>2</sub>BF<sub>4</sub>, (TMTTF)<sub>2</sub>PF<sub>6</sub> and (TMTTF)<sub>2</sub>AsF<sub>6</sub> as reported in literature.**

|                             | (TMTTF) <sub>2</sub> BF <sub>4</sub> [3] |                      | (TMTTF) <sub>2</sub> ClO <sub>4</sub> | (TMTTF) <sub>2</sub> PF <sub>6</sub> |                      | (TMTTF) <sub>2</sub> AsF <sub>6</sub> |                      |
|-----------------------------|------------------------------------------|----------------------|---------------------------------------|--------------------------------------|----------------------|---------------------------------------|----------------------|
| CCDC reffcode               | TMTFBF01                                 | TMTFBF10             | MTHFPC10[4]                           | MTHFPF[5]                            | MTHFPF01[6]          | BUHGAM[7]                             | BUHGAM01[6]          |
| System and space group      | Triclinic $P\bar{1}$                     | Triclinic $P\bar{1}$ | Triclinic $P\bar{1}$                  | Triclinic $P\bar{1}$                 | Triclinic $P\bar{1}$ | Triclinic $P\bar{1}$                  | Triclinic $P\bar{1}$ |
| T°                          | 100 K                                    | RT                   | RT                                    | RT                                   | 4 K                  | RT                                    | 4 K                  |
| <i>a</i> (Å)                | 6.97(1)                                  | 7.112(3)             | 7.115(3)                              | 7.650                                | 6.936(5)             | 7.178(4)                              | 6.898(5)             |
| <i>b</i> (Å)                | 7.49(1)                                  | 7.468(3)             | 7.515(2)                              | 13.23                                | 7.508(4)             | 7.610(3)                              | 7.553(3)             |
| <i>c</i> (Å)                | 12.89(2)                                 | 12.946(3)            | 12.992(3)                             | 7.14                                 | 13.045(5)            | 13.317(4)                             | 13.166(5)            |
| $\alpha$ (°)                | 85.6(1)                                  | 85.56(2)             | 84.41(2)                              | 94.30                                | 83.70(4)             | 82.03(3)                              | 83.45(2)             |
| $\beta$ (°)                 | 93.2(1)                                  | 94.05(2)             | 85.27(2)                              | 108.75                               | 87.20(3)             | 95.75(3)                              | 87.20(3)             |
| $\gamma$ (°)                | 110.1(1)                                 | 108.80(4)            | 71.53(3)                              | 83.15                                | 70.81(5)             | 107.11(3)                             | 70.73(3)             |
| <i>V</i> (Å <sup>3</sup> )  | 629.77(163)                              | 648.196              | 654.78(38)                            | 678.885                              | 637.66(65)           | 687.168                               | 643.25(60)           |
| Plane-to-plane distance (Å) | 3.48                                     |                      | 3.51                                  |                                      | 3.46                 |                                       | 3.45                 |

**Table S7: Measured conductivity ( $\text{S cm}^{-1}$ ) data on single crystals of  $(\text{TMTTF})_2\text{X}$  ( $\text{X} = \text{PF}_6$ ,  $\text{ClO}_4$ ,  $\text{AsF}_6$ ,  $\text{BF}_4$ ) along the  $b$  axis at ambient pressure using two-point probe methods compared with literature data (with four-point probe methods), both at room temperature.**

| <b>Material</b>                | <b>Conductivity (<math>\text{S.cm}^{-1}</math>)<br/>(four-point measurements)</b> | <b>Conductivity (<math>\text{S.cm}^{-1}</math>)<br/>(two-point measurements)</b> |
|--------------------------------|-----------------------------------------------------------------------------------|----------------------------------------------------------------------------------|
| $(\text{TMTTF})_2\text{BF}_4$  | 50 [8]                                                                            | 3.47 [this work]                                                                 |
| $(\text{TMTTF})_2\text{ClO}_4$ | 30 [8]                                                                            | 4.60 [this work]                                                                 |
| $(\text{TMTTF})_2\text{PF}_6$  | 20 [8]                                                                            | 0.015 [this work]                                                                |
| $(\text{TMTTF})_2\text{AsF}_6$ | 25 [9]                                                                            | 1.75 [this work]                                                                 |

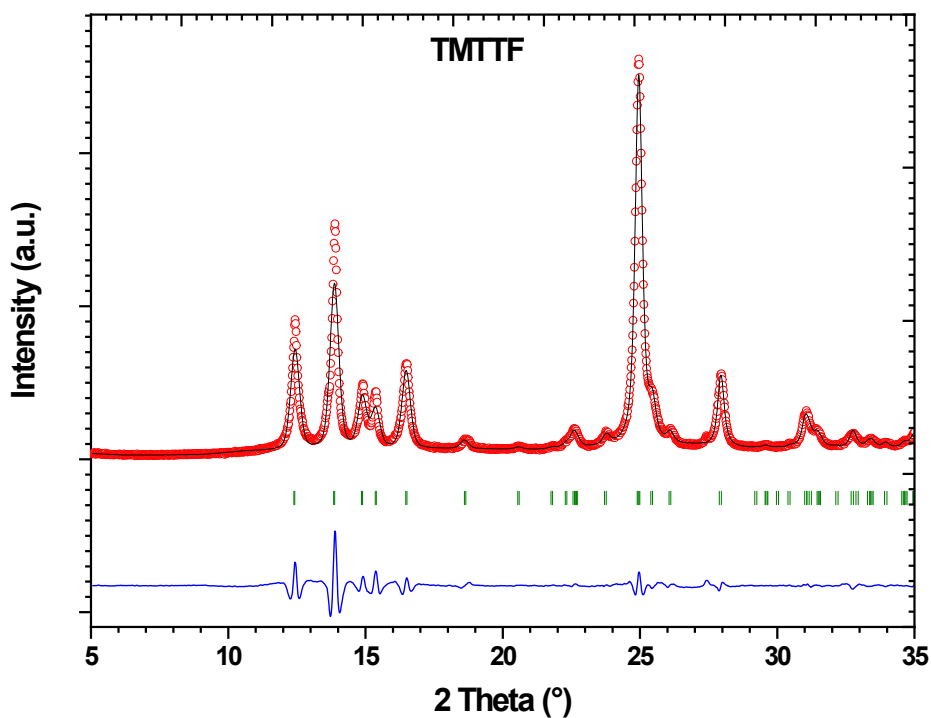

**Figure S4:** Rietveld refinement of TMTTF, the experimental data (red dots), calculated pattern (black line), Bragg positions (green markers) and difference curve (blue line).

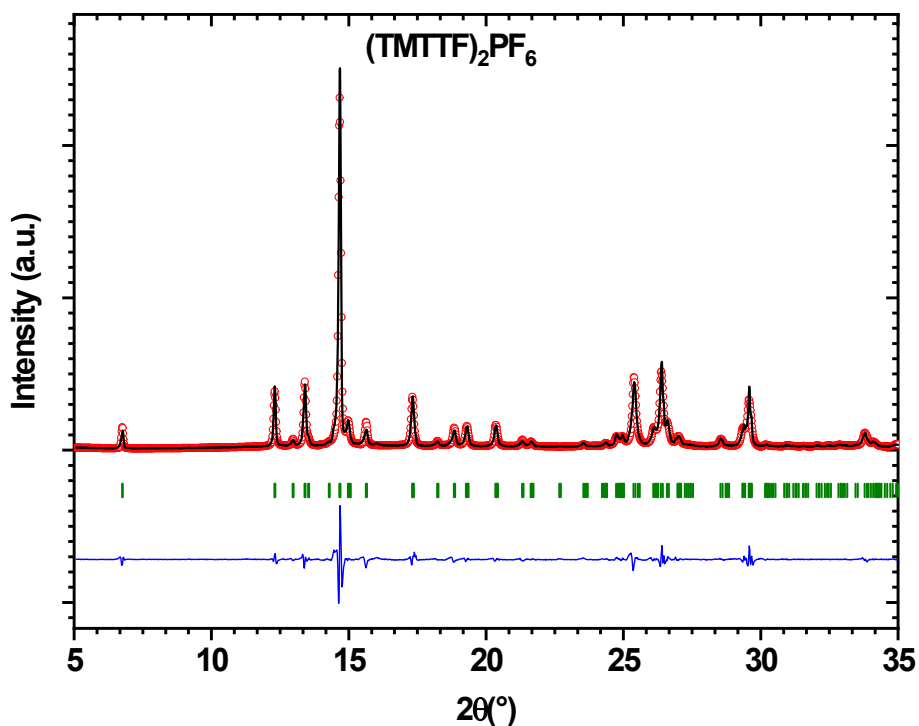

**Figure S5:** Rietveld refinement of  $(\text{TMTTF})_2\text{PF}_6$ , the experimental data (red dots), calculated pattern (black line), Bragg positions (green markers) and difference curve (blue line).

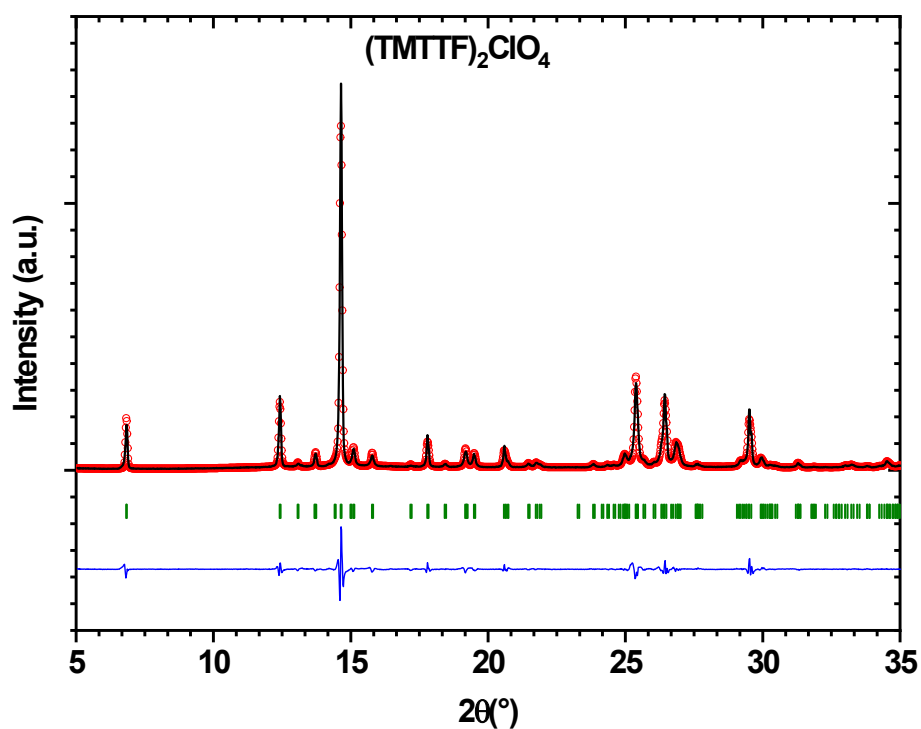

**Figure S6:** Rietveld refinement of  $(\text{TMTTF})_2\text{ClO}_4$ , the experimental data (red dots), calculated pattern (black line), Bragg positions (green markers) and difference curve (blue line).

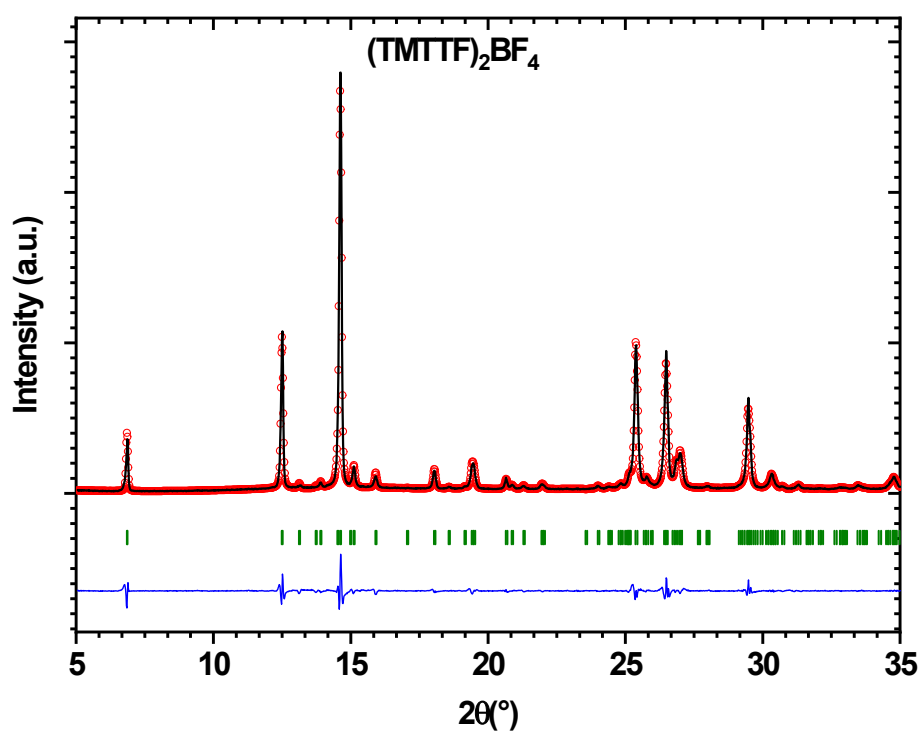

**Figure S7:** Rietveld refinement of  $(\text{TMTTF})_2\text{BF}_4$ , the experimental data (red dots), calculated pattern (black line), Bragg positions (green markers) and difference curve (blue line).

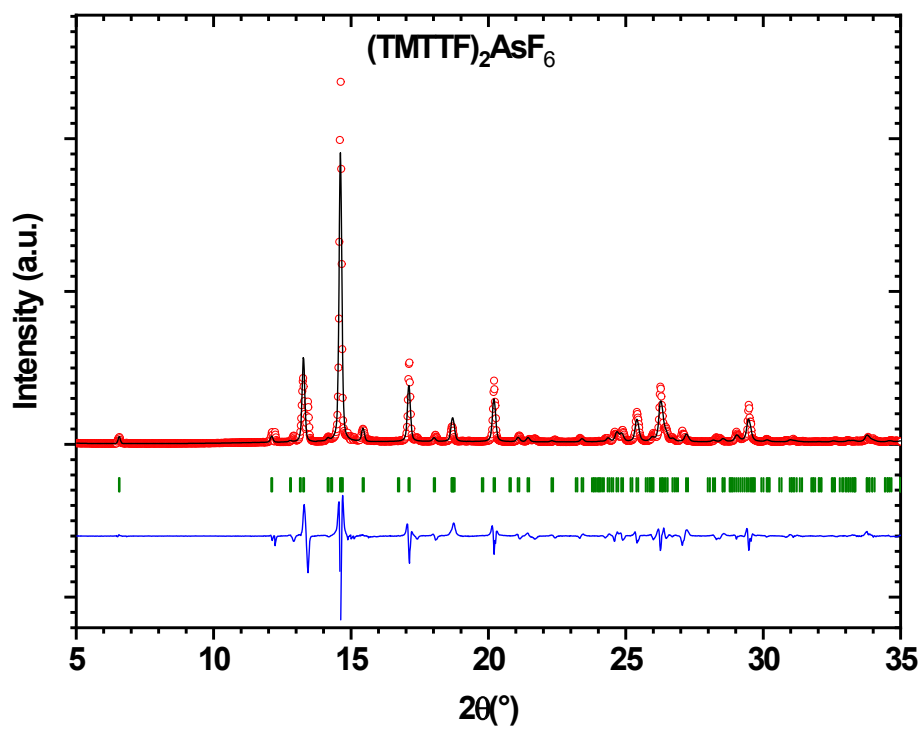

**Figure S8:** Rietveld refinement of  $(\text{TMTTF})_2\text{AsF}_6$ , the experimental data (red dots), calculated pattern (black line), Bragg positions (green markers) and difference curve (blue line).

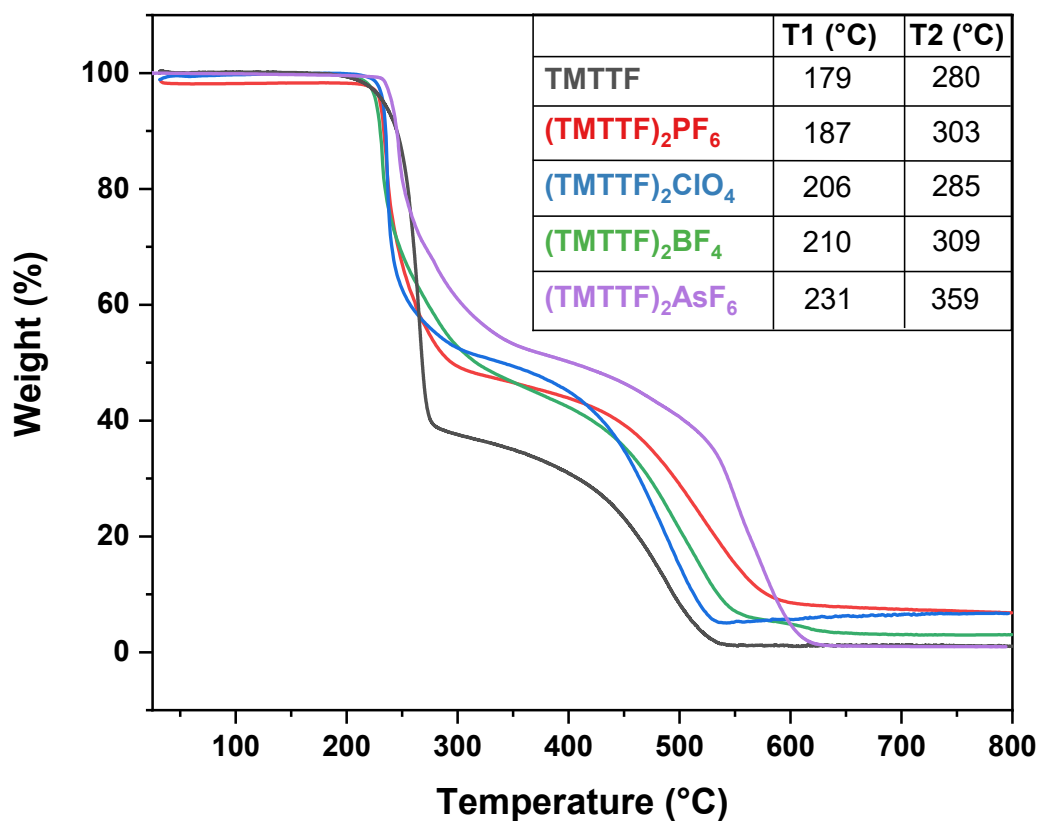

Figure S9: Thermogravimetric analysis under air at 5°C.min<sup>-1</sup> with an input of the degradation temperature on TMTTF (grey) and radical salt associated with PF<sub>6</sub><sup>-</sup> (red), ClO<sub>4</sub><sup>-</sup> (blue), BF<sub>4</sub><sup>-</sup> (green) and AsF<sub>6</sub><sup>-</sup> (purple) anions.

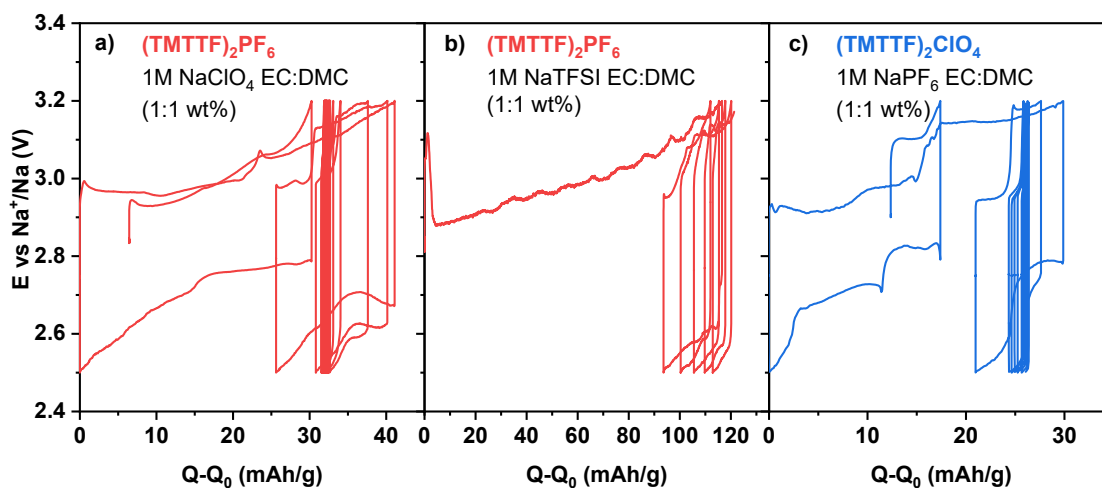

**Figure S10: Galvanostatic potential-composition profile of a)  $(\text{TMTTF})_2\text{PF}_6$  using 1M  $\text{NaClO}_4$  EC:DMC (1:1 wt%), b)  $(\text{TMTTF})_2\text{PF}_6$  using 1M  $\text{NaTFSI}$  EC:DMC (1:1 wt%) and c)  $(\text{TMTTF})_2\text{ClO}_4$  using 1M  $\text{NaPF}_6$  EC:DMC (1:1 wt%) as electrolyte. The electrode is mixed with 30 % of C45 cycled at C/10 between 2.4 and 3.2 V vs  $\text{Na}^+/\text{Na}$ .**

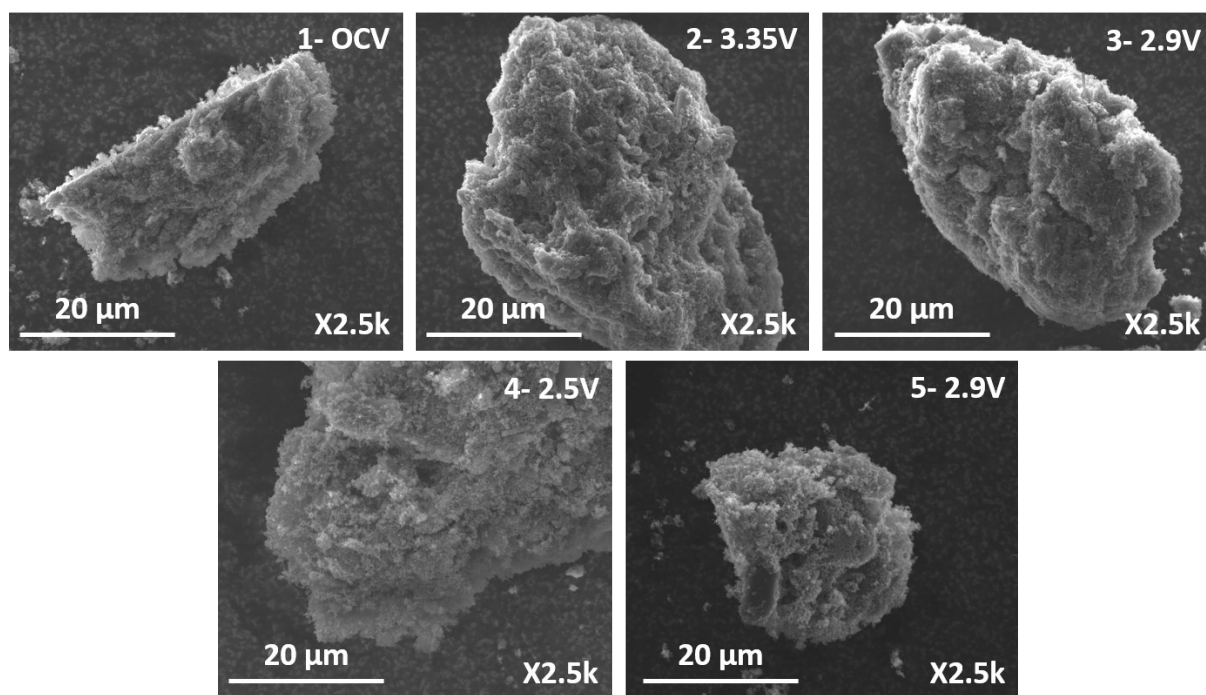

**Figure S11:** *Ex situ* SEM characterisation of the  $(\text{TMTTF})_2\text{PF}_6$  electrode with 30 % of conductive carbon at different states of charge.

Figure S12: XRD comparison between the initial material  $(\text{TMTTF})_2\text{PF}_6$ , *in situ* measurement at 3.35V where  $(\text{TMTTF})\text{PF}_6$  is expected to form and simulated pattern of  $(\text{TMTTF})\text{BF}_4$ .

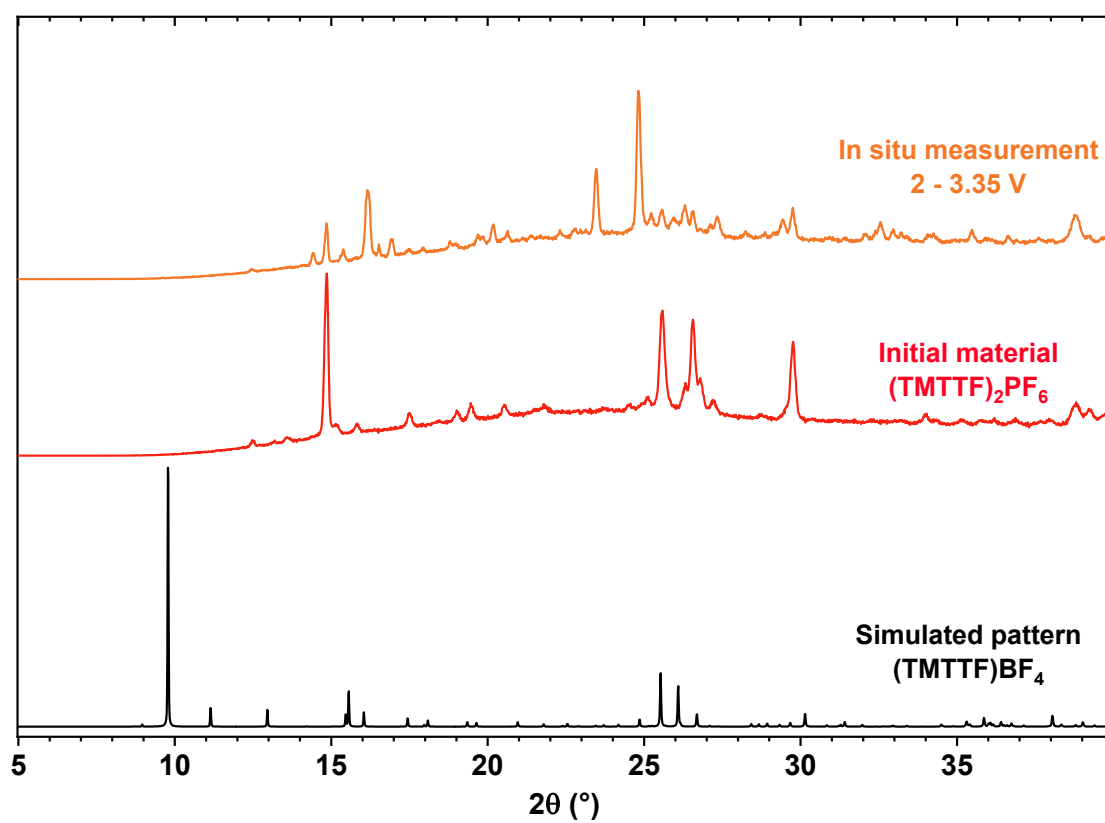



The CV of the TMTTF were performed in  $\text{CH}_2\text{Cl}_2$  and in  $\text{CH}_3\text{CN}$  using 0.1 M  $\text{Bu}_4\text{NPF}_6$  as supporting electrolyte. Voltammograms were recorded at 0.1 V/s on a platinum electrode and the potentials were measured versus saturated calomel electrode (SCE)

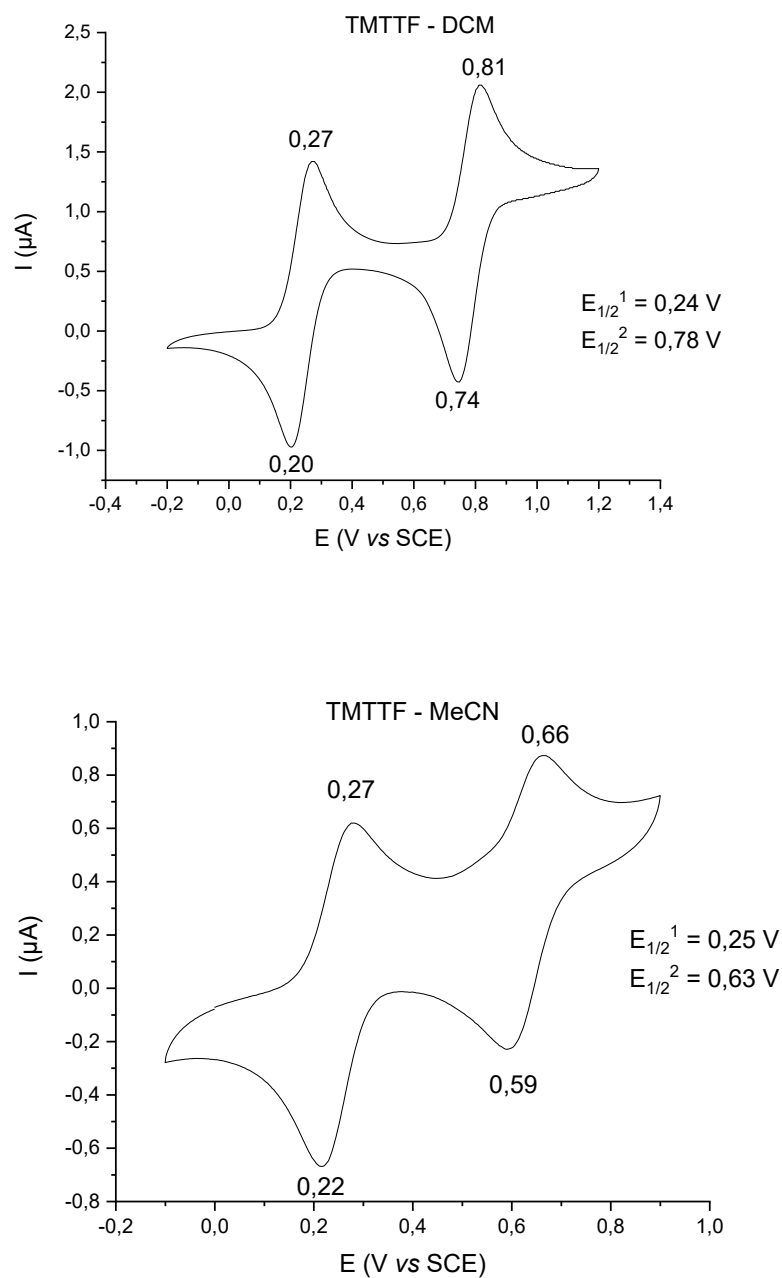

**Figure S13:** Cyclic voltammograms of TMTTF in  $\text{CH}_2\text{Cl}_2$  (top) and in  $\text{CH}_3\text{CN}$  (bottom) 0.1 M  $\text{NBu}_4\text{PF}_6$  at  $100 \text{ mV}\cdot\text{s}^{-1}$

## References

- [1] H. Mora, J. Fabre, L. Giral, et C. Montginoul, « Synthèses et caractérisation des dérivés méthylés du tétrathiafulvalène ; nouvelle voie d'accès au tétrathiafulvalène », *Bulletin des Sociétés Chimique Belges*, vol. 101, n° 2, p. 137-146, 1992.
- [2] K. Honda, S. Takasaki, J.-I. Yamada, S.-I. Nakatsuji, et H. Anzai, « Tetramethyltetrafulvalenium Bromide Benzonitrile Water Solvate », *Acta Crystallogr C Cryst Struct Commun*, vol. 54, n° 2, p. 261-264, févr. 1998, doi: 10.1107/S0108270197013905.
- [3] J. L. Galigné *et al.*, « Structure cristalline du fluoroborate de tétraméthyltétrathiafulvalène (TMTTF)<sub>2</sub>BF<sub>4</sub> à 100 K et à température ambiante », *Acta Crystallogr B Struct Crystallogr Cryst Chem*, vol. 35, n° 5, p. 1129-1135, mai 1979, doi: 10.1107/S0567740879005720.
- [4] B. Liautard, S. Peytavin, G. Brun, D. Chasseau, J. M. Fabre, et L. Giral, « Structure du di(tétraméthyltétrathiafulvalénium) perchlorate [(TMTTF)<sub>2</sub>ClO<sub>4</sub>], 2C<sub>10</sub>H<sub>12</sub>S<sub>40</sub>,<sup>5+5+</sup>.ClO<sub>4</sub><sup>-</sup> », *Acta Crystallogr C Cryst Struct Commun*, vol. 40, n° 6, p. 1023-1026, juin 1984, doi: 10.1107/S010827018400665X.
- [5] G. Brun *et al.*, « SELS DU RADICAL CATIONIQUE TMTTF (Tétraméthyltétrathiofulvalène). STRUCTURES ET PROPRIÉTÉS », *J. Phys. Colloques*, vol. 38, n° C7, p. C7-266-C7-269, déc. 1977, doi: 10.1051/jphyscol:1977751.
- [6] T. Granier, B. Gallois, L. Ducasse, A. Fritsch, et A. Filhol, « 4 K crystallographic and electronic structures of (TMTTF)<sub>2</sub>X salts (X<sup>-</sup>: PF<sub>6</sub><sup>-</sup>, AsF<sub>6</sub><sup>-</sup>) », *Synthetic Metals*, vol. 24, n° 4, p. 343-356, juin 1988, doi: 10.1016/0379-6779(88)90310-4.
- [7] B. Liautard, S. Peytavin, G. Brun, et M. Maurin, *Crystal Structure Communications*, vol. 11, p. 1841, 1982.
- [8] P. Delhaes *et al.*, « Physical Properties of One Dimensional Conductors », *Molecular Crystals and Liquid Crystals*, vol. 50, n° 1, p. 43-58, janv. 1979, doi: 10.1080/15421407908084413.
- [9] R. Laversanne, C. Coulon, B. Gallois, J. P. Pouget, et R. Moret, « Structural and electrical properties of (TMTTF)<sub>2</sub>MF<sub>6</sub> salts (M = P, As, Sb). Rôle of the anions », *J. Physique Lett.*, vol. 45, n° 8, p. 393-399, 1984, doi: 10.1051/jphyslet:01984004508039300.
